# Supplementary material
Source: publisher site journal article supplement (https://www.dovepress.com/get_supplementary_file.php?f=395266.docx)
Supplement: Supplementary file 1 [file get_supplementary_file.php]

Solubilisation and Enhanced Oral Absorption of Curcumin Using a Natural Non-nutritive Sweetener Mogroside V


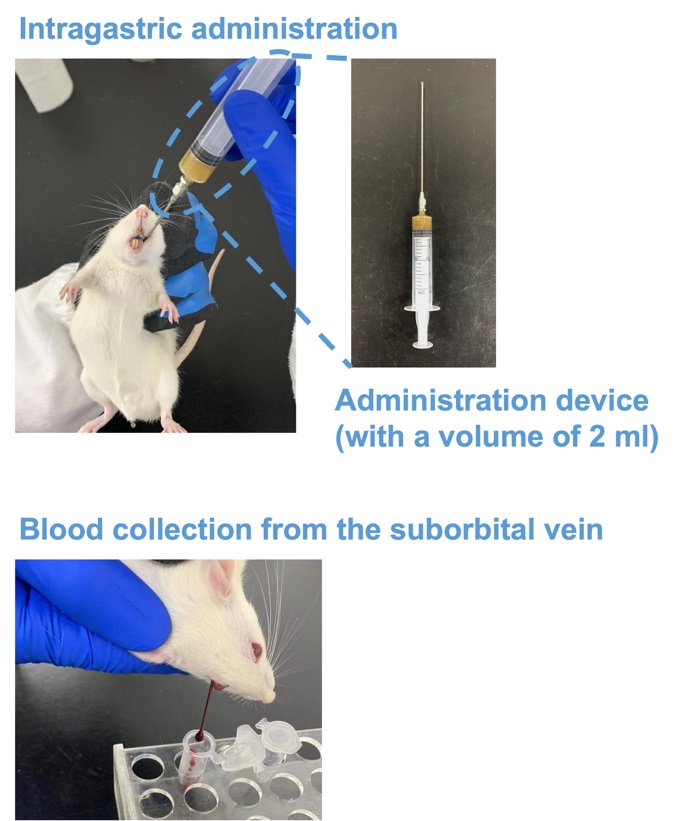
**Supplementary Information (SI): The oral administration of curcumin to rats**

**Figure S1**. The oral administration of curcumin to rats using an intragastric needle.

In the oral absorption experiments, the rat was orally administered with curcumin at a dose of 100 mg/kg. **Fig. S1** showed the rat, weighing ~200 g, was given 2 mL CUR/Mog-V SDPs aqueous solution (10 mg/mL), by using an intragastric needle (No. 16) attached to a syringe.

Afterwards, the blood sample of 0.3 mL was collected immediately from the suborbital vein under ether anaesthesia and placed in heparinised 1.5 mL polythene tubes at 5-, 15-, 30-, 60-, 120- and 240-minutes post dosing.
